# Supplementary material
Source: PubMed Central journal article supplement (PMC6237197)
Supplement: NIHMS990062-supplement-Supp_file.pdf [file NIHMS990062-supplement-Supp_file.pdf]

# **The spastic paraplegia-associated phospholipase DDHD1 is a primary brain phosphatidylinositol lipase**

Jordon M. Inloes, Hui Jing, Benjamin F. Cravatt<sup>†</sup>

Department of Chemistry, The Skaggs Institute for Chemical Biology, The Scripps Research Institute, La Jolla, California 92037, United States

## SUPPORTING INFORMATION

### Methods

#### Western blotting

Rabbit polyclonal DDHD1 antibody (Thermo Fisher Scientific, Cat. No. PA5-62070) was used for Western Blotting at a concentration of 1:1000. Mouse monoclonal GAPDH antibody (Santa Cruz Biotechnology, Cat. No. sc-47724) was used for Western Blotting at a concentration of 1:200. Secondary antibodies IRDye® 800CW Goat anti-Mouse IgG (Cat. No. 926-32210) and IRDye® 680LT Donkey anti-Rabbit IgG (Cat. No. 926-68023) were used for Western Blotting at concentrations of 1:10,000.

#### Behavioral characterization of DDHD1<sup>-/-</sup> mice

All the behavioral tests were performed in The Scripps Research Institute mouse behavior assessment core facility. Mice were housed in groups in a temperature-controlled room with lights regulated on a 12-hr light/dark cycle (lights off at 0600 hours) and food and water were available ad libitum. Behavior was monitored during the dark phase when mice are most active. For our studies, a cohort of age- and sex-matched DDHD2<sup>-/-</sup>, DDHD2<sup>+/-</sup>, and DDHD2<sup>+/+</sup> mice from DDHD2<sup>+/-</sup> parents (n = 13 mice per genotype, mixed sex) were tested for locomotor activity and cognition at 6 months of age. Animal experiments were conducted in accordance with the guidelines of the Institutional Animal Care and Use Committee of The Scripps Research Institute.

**Footprint pattern test.** Basic gait measures can be assessed using simple footprint pattern analysis<sup>1,2</sup>. For example, a mouse model of Ataxia telangiectasia had shorter stride lengths than WT mice<sup>3</sup>. Non-toxic paint was applied to each mouse's paws (a different color was used for front and back paws). The mouse was then placed at one end of a runway covered in paper and allowed to ambulate until their paws no longer left marks. Measurements were forelimb and hindlimb stride lengths (left and right). Three full strides were averaged for each mouse's values. Data were excluded from mice that did not make 3 measurable strides (i.e. they circled or stopped).

**Hanging wire test.** The hanging wire test allows for the assessment of grip strength and motor coordination<sup>4,5</sup>. Mice were held so that only their forelimbs contact an elevated metal bar (2 mm diameter, 45 cm long, 37 cm above the floor) held parallel to the table by a large ring stand and let go to hang. Each mouse was given three trials separated by 30 seconds. Each trial was scored as follows and the average for each mouse was calculated: 0 — fell off, 1 — hung onto the wire by two forepaws, 2 — hung onto the wire by two forepaws, but also attempted to climb onto the wire, 3 — hung onto the wire by two forepaws plus one or both hindpaws around the wire, 4 — hung onto the wire by all four paws plus tail wrapped, 5 — escaped (crawled to the ring stand and righted itself or climbed down the stand to the table). Latency to falling off was also measured up to a maximum of 30 s.

**Locomotor activity.** Locomotor activity was measured in polycarbonate cages (42 x 22 x 20 cm) placed into frames (25.5 x 47 cm) mounted with two levels of photocell beams at 2 and 7 cm above the bottom of the cage (San Diego Instruments, San Diego, CA). These two sets of beams allowed for the recording of both horizontal (locomotion) and vertical (rearing) behavior. A thin layer of bedding material was applied to the bottom of the cage. Mice were tested for 120 min and data were collected at 5 min intervals.

**Rotarod test.** Rotarod balancing requires a variety of proprioceptive, vestibular, and fine-tuned motor abilities as well as motor learning capabilities<sup>1</sup>. A Roto-rod Series 8 apparatus (IITC Life Sciences, Woodland Hills, CA) was used which records test results when the animal drops

onto the individual sensing platforms below the rotating rod. An accelerating test strategy was used whereby the rod started at 0 rpm and then accelerated at 10 rpm. The mice were tested in two sets of 3 trials per day for two days, for a total of 12 trials.

**Y-maze test for spontaneous alternations.** To determine spontaneous alternation behavior, a measure of spatial working memory, exploratory behavior and responsiveness to novelty<sup>6,7</sup>, we tested mice in a Y-maze with 34 x 8 x 14 cm arms. Each mouse received one 5 min trial during which arm choices and total numbers of arm entries were recorded. Spontaneous alternation, expressed as a percentage, refers to the ratio of arm choices differing from the previous two choices, to the total number of arm entries. Mice have the opportunity to do repeated entries into a single arm, resulting in a chance performance level of 22% (2/9) for spontaneous alternations<sup>8,9</sup>. Healthy young mice make 60-70% spontaneous alternations.

**von Frey test.** Tactile allodynia was tested on the plantar region of the hind paw and the lumbar spine using von Frey filaments with forces of 0.04, 0.16, 0.4, 1.0 and 4.0 g. Filaments were tested by applying them to the paw until they bent slightly in ascending order and repeated ten times. A positive response to the filament was defined as a hind paw flexion reflex. The number of positive responses to each filament was used to create a sensitivity curve. For this test, mice were placed in an open cylinder on top of an elevated wire platform, allowing access from below and acclimated for 5 min prior to testing.

**Acetone test.** Cold sensitivity was assessed by measuring the time spent in acetone-evoked behaviors for 1 minute after a drop (25  $\mu$ l) of acetone was applied gently to the plantar surface of the left hind paw (behaviors = paw elevation, flinching, biting, licking, and scratching time).

**Hot plate test.** To examine thermal nociception (which requires circuitry in the brain as well as spinal cord), mice were placed in a glass cylinder on a 52-52.5 °C or 49.5-50°C hot plate<sup>10</sup>. Latency to a nociceptive response (hind paw lick, flick, or jump) was measured, and mice were immediately removed from the apparatus. If a nociceptive response was not seen within 30 s, the test was stopped.

### **Structural characterization of lipids altered in DDHD1<sup>-/-</sup> brain tissue**

Fragmentation pattern analysis was performed with the Agilent 6520 Q-TOF. The same column chromatography conditions used for discovery metabolite profiling were used to compare retention times significantly altered DMP features and commercially available lipid standards. MS1 and MS2 spectra were collected with the following MS2 fragmentation parameters: (proposed metabolite, precursor ion, collision energy, fragmentor voltage) C38:4 PI, 883.5, 40 V, 100 V; C38:4 PI, 885.5, 40 V, 100 V; C20:4 LPI, 619.3, 40 V, 100 V.

### **Targeted lipidomic analysis**

Phospholipids were quantified using multiple reaction monitoring (MRM) on an Agilent 6410 QQQ LC/MS instrument. The source temperature was 350 °C, capillary voltage was 3500 V and -3500V for positive and negative mode, respectively, gas flow was 9 L/min, nebulizer pressure was 35 psi. Chromatographic separations were performed using the same mobile phases and column as for discovery metabolite profiling. The following gradient was used: 0% B for 5 min, increase to 100% B over 19 min, hold 100% B for 4 min, switch to 0% B, hold 0%B for 3 min. The following table contains MRM acquisition parameters that were applied to generate lists of lipids based on defined fragmentation patterns. Data were analyzed with MassHunter Quantitative Analysis software (Agilent) and signals for endogenous lipids were normalized to the concentration of appropriate internal standards (C17:1 LPG, C17:1 LPS, C17:1 LPI, C17:0 LPA, C17:0 LPC, C17: 1 LPE, C17:0/C17:0 PS, C16:0 D31 /C18:1 PI, C17:0/C20:4 PI(3)P, C17:0/C20:4 PI(4,5)P<sub>2</sub>, C17:0/C20:4 PI(3,4,5)P<sub>3</sub>, C16:0 D31/C18:1 PG, C14:0/C14:0 BMP,

C12:0/C12:0 PC, C12:0/C12:0 PE, C16:0 D31/C18:1 PA, C17:1/C17:1/C17:1 TAG, C18:0/C20:4 D8 DAG),and wet weight of tissues or number of cells.

MRM parameters of various phospholipid classes.

| Lipid class      | Precursor ion                     | Fragment ion                          | MS1 resolution | Collision energy (V) | MS2 resolution | Fragmentor (V) | Dwell (ms) | Polarity |
|------------------|-----------------------------------|---------------------------------------|----------------|----------------------|----------------|----------------|------------|----------|
| PE               | [M+H] <sup>+</sup>                | Neutral loss of 141                   | Unit           | 20                   | Unit           | 100            | 50         | Positive |
| LPE              | [M+H] <sup>+</sup>                | Neutral loss of 141                   | Unit           | 15                   | Unit           | 100            | 50         | Positive |
| PC               | [M+H] <sup>+</sup>                | 184.1                                 | Unit           | 25                   | Unit           | 100            | 50         | Positive |
| LPC              | [M+H] <sup>+</sup>                | 184.1                                 | Unit           | 20                   | Unit           | 100            | 50         | Positive |
| PIP              | [M-H] <sup>-</sup>                | 240                                   | Unit           | 28                   | Unit           | 172            | 50         | Negative |
| PIP <sub>2</sub> | [M-H] <sup>-</sup>                | Neutral loss of 98                    | Unit           | 24                   | Unit           | 218            | 50         | Negative |
| PI               | [M-H] <sup>-</sup>                | [fatty acid-H] <sup>-</sup>           | Unit           | 50                   | Unit           | 260            | 50         | Negative |
| LPI              | [M-H] <sup>-</sup>                | [fatty acid-H] <sup>-</sup>           | Unit           | 36                   | Unit           | 260            | 50         | Negative |
| PS               | [M-H] <sup>-</sup>                | [fatty acid-H] <sup>-</sup>           | Wide           | 35                   | Unit           | 100            | 50         | Negative |
| LPS              | [M-H] <sup>-</sup>                | Neutral loss of 87                    | Wide           | 15                   | Unit           | 100            | 50         | Negative |
| PG               | [M-H] <sup>-</sup>                | [fatty acid-H] <sup>-</sup>           | Unit           | 40                   | Unit           | 150            | 50         | Negative |
| BMP              | [M+NH <sub>4</sub> ] <sup>+</sup> | [MAG-H <sub>2</sub> O+H] <sup>+</sup> | Wide           | 20                   | Unit           | 100            | 50         | Positive |
| LPG              | [M-H] <sup>-</sup>                | [fatty acid-H] <sup>-</sup>           | Unit           | 40                   | Unit           | 100            | 50         | Negative |
| PA               | [M-H] <sup>-</sup>                | [fatty acid-H] <sup>-</sup>           | Unit           | 40                   | Unit           | 150            | 50         | Negative |
| LPA              | [M-H] <sup>-</sup>                | 79                                    | Unit           | 40                   | Unit           | 100            | 50         | Negative |
| PG               | [M+NH <sub>4</sub> ] <sup>+</sup> | neutral loss of 189                   | Wide           | 15                   | Unit           | 100            | 50         | Positive |

Diagnostic fragments that provide structural information about lipid classes are were targeted in MRM mode on an Agilent 6410B QQQ. MS1 resolutions were chosen to avoid contamination of signals with lipids related by unsaturation ( $\pm 2$  amu). Fragmentor energy and collision energy were optimized for each lipid class using representative internal standards.



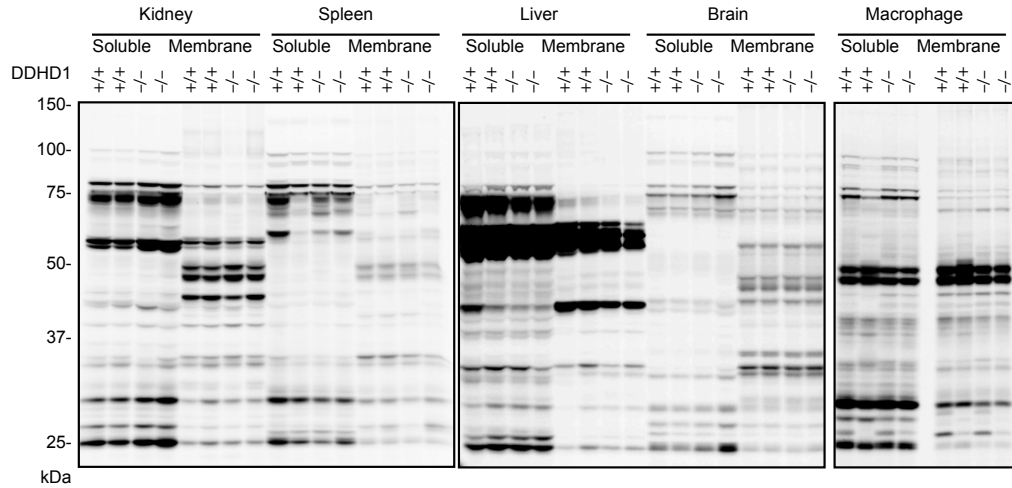

**Figure S2. Gel-based ABPP with the general serine hydrolase probe FP-Rh does not detect DDHD1 signals in mouse tissue lysates.** Kidney, spleen, liver, brain, and macrophage proteomes were separated into soluble and membrane fractions, labeled with the general serine hydrolase activity-based probe, fluorophosphate-rhodamine (FP-Rh), and separated by SDS-PAGE. DDHD1 has a predicted molecular weight of ~100 kDa, but an FP-Rh-labeled protein of this size was not observed to be selectively expressed in DDHD1<sup>+/+</sup>, but not DDHD1<sup>-/-</sup> tissues. Instead, loss of DDHD1 activity in DDHD1<sup>-/-</sup> tissues was confirmed by MS-based ABPP (see **Figure 1E**).

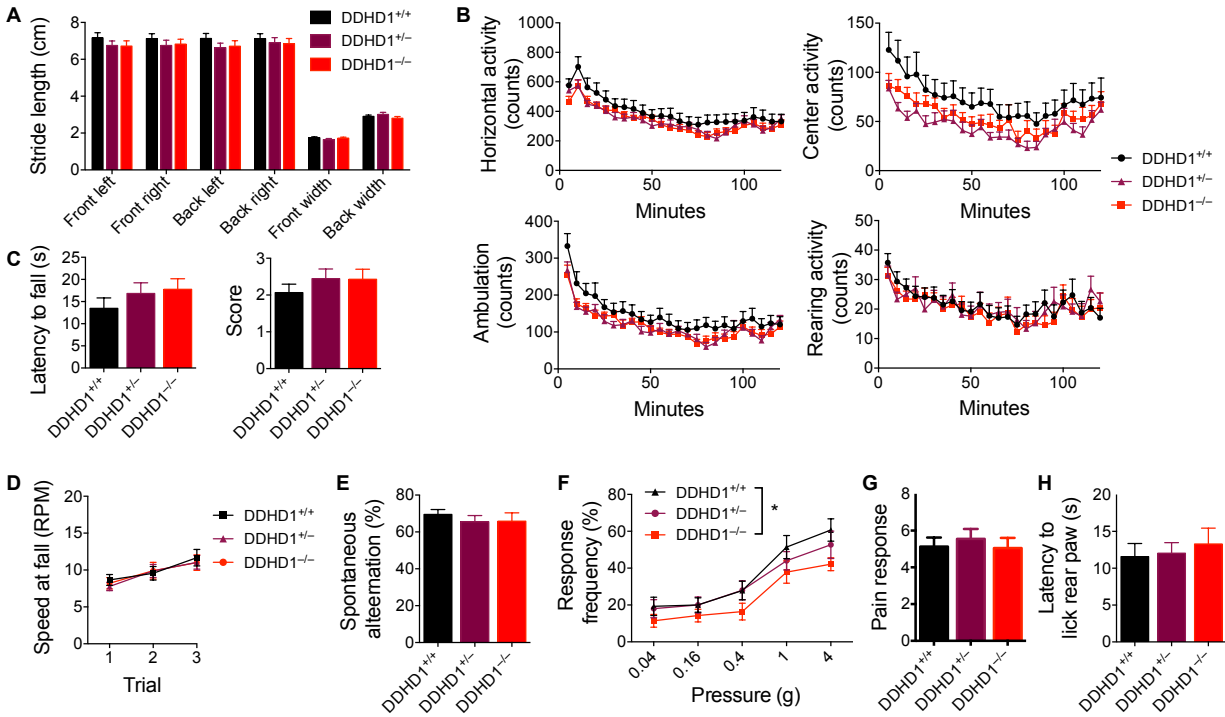

**Figure S3. Behavioral characterization of DDHD1<sup>-/-</sup> mice.** (A) Gait analysis measuring distance between subsequent foot placement of DDHD1<sup>-/-</sup>, DDHD1<sup>+/-</sup>, and DDHD1<sup>+/+</sup> mice. (B) Activity levels of mice, as measured by photobeam breaks. Horizontal activity denotes the sum of fine movements and ambulation. Ambulation refers to concerted forward motion. Center activity correlates with lower anxiety levels and rearing denotes vertical movements. (C) Motor function as assessed by the time before falling and the score assigned to mouse performance during the hanging wire test. (D) The rotarod test of coordinated movement. (E) The Y-Maze test of working memory measuring the propensity of mice to explore a new arm of the maze. (F) Paw withdrawal in response to forces applied underside of the paw by Von Frey filaments among DDHD1 genotypes. (G and H) Thermal pain sensitivity as measured by response to cold stimulus (G) in the acetone evaporation test, or response to heat (H) in the hotplate test. Data represents mean  $\pm$  S.E.M. for 14-16 mice per group. \*  $p < 0.05$  for DDHD1<sup>-/-</sup> and DDHD1<sup>+/-</sup> mice.

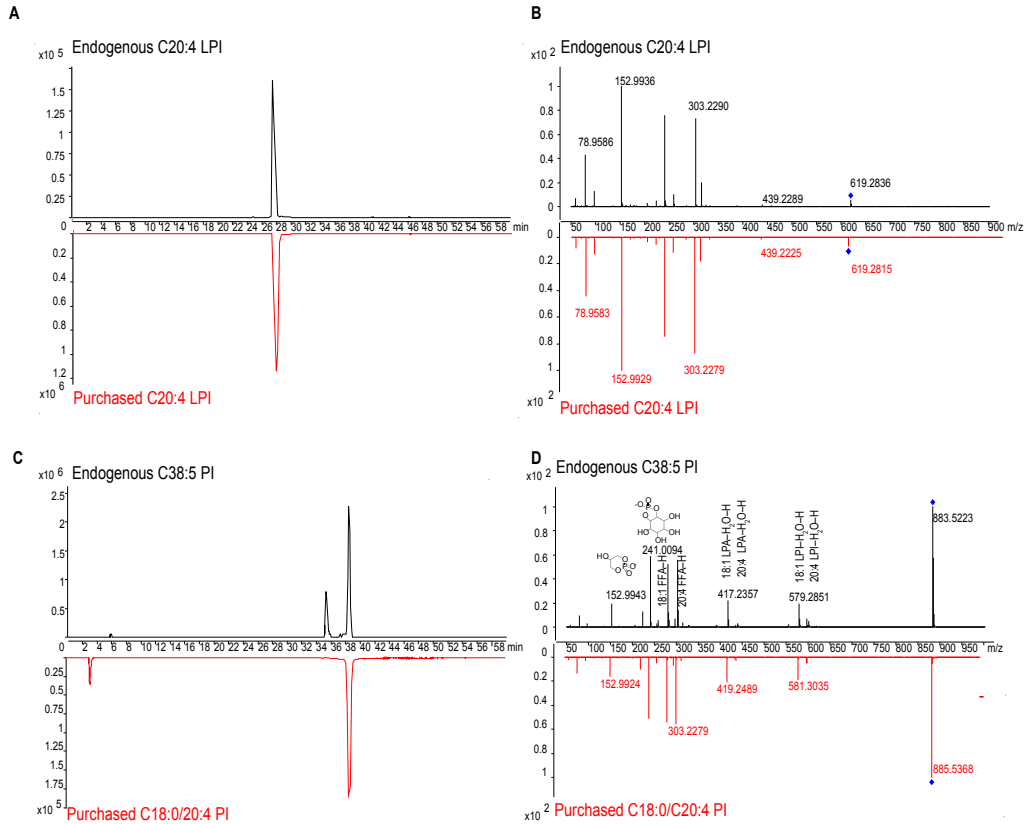

**Figure S4. Structural assignment of DDHD1-regulated metabolites by comparison of retention time and fragmentation spectra to lipid standards.** Metabolites altered in DDHD1<sup>-/-</sup> brain were eluted from a Gemini C18 50 cm x 4.6 cm, 5 $\mu$ m particle column using the gradient described in the Methods and isolated and fragmented with 40 V collision energy using an Agilent 6520 Q-TOF. **(A)** Extracted ion chromatogram of a feature corresponding to the [M-H]<sup>-</sup> ion of C20:4 LPI ( $m/z$  619.29) lipid from mouse brain (black) is equivalent to that of a purchased C20:4 LPI standard (red). **(B)** Equivalent MS2 spectra were observed for the endogenous lipid from mouse brain (black) and a purchased standard (red). **(C)** Extracted ion chromatogram of a feature corresponding to the [M-H]<sup>-</sup> ion of C38:5 PI ( $m/z$  883.53) from mouse brain (black) is similar to that of commercially available C18:0/C20:4 PI standard (red). **(D)** The MS2 spectrum of endogenous and commercially available PI lipids are similar, with a diagnostic PI peak of  $m/z$  241. Endogenous C18:0/C20:4 PI was not significantly altered in DDHD1<sup>-/-</sup> brain, however it was used as a standard because C18:1/C20:4 PI is not commercially available and both PI lipids have a similar retention time and fragmentation pattern. The fragment ions we observed were consistent with published studies of collision-induced fragmentation of PI<sup>11</sup>.



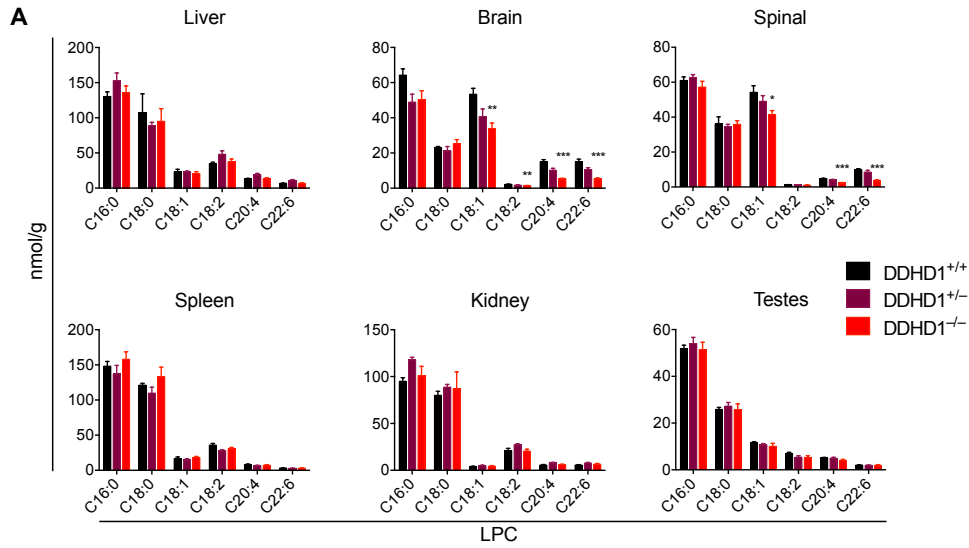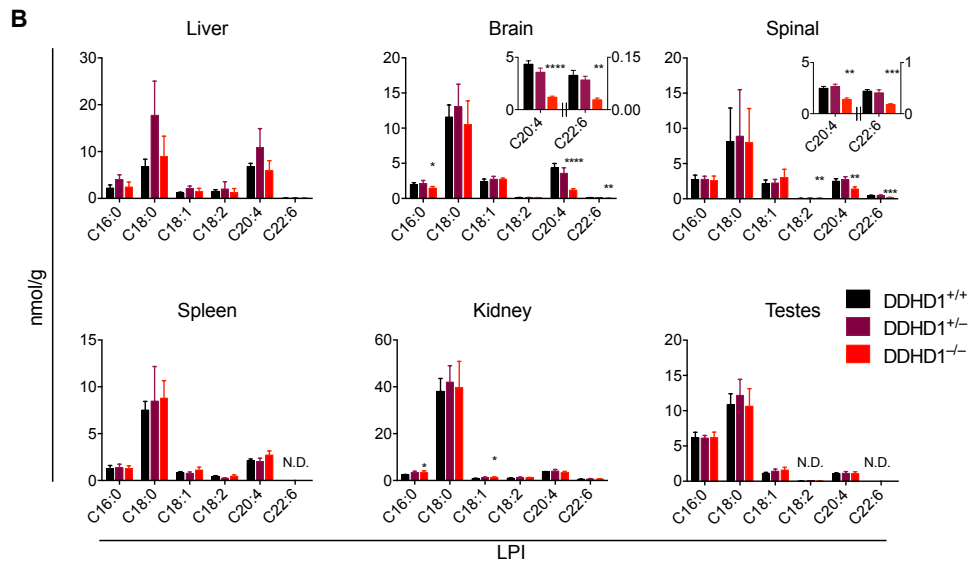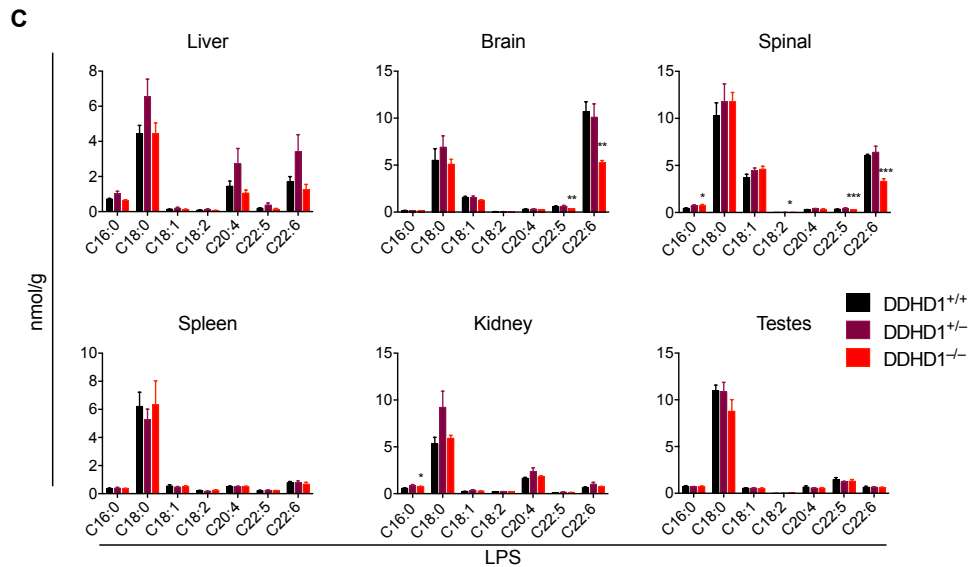

**Figure S5. Targeted LC-M-based quantification of lysophospholipids in tissues from DDHD1<sup>-/-</sup> mice.** Frozen tissues were extracted in organic solvents in the presence of lipid internal standards to quantify lysophospholipid levels. **(A-C)** Targeted LC-M-based quantification of the indicated lysophosphatidylcholine (LPC) **(A)**, lysophosphatidylinositol (LPI) **(B)**, and lysophosphatidylserine (LPS) **(C)** lipids in DDHD1<sup>-/-</sup> brain and spinal cord tissues from DDHD1<sup>+/+</sup>, DDHD1<sup>+/-</sup>, and DDHD1<sup>-/-</sup> mice N = 4, error bars represent mean ± SEM. \* P<0.05, \*\* P<0.01, \*\*\* P<0.001, \*\*\*\* P<0.0001, DDHD1<sup>+/+</sup> vs. DDHD1<sup>-/-</sup>.

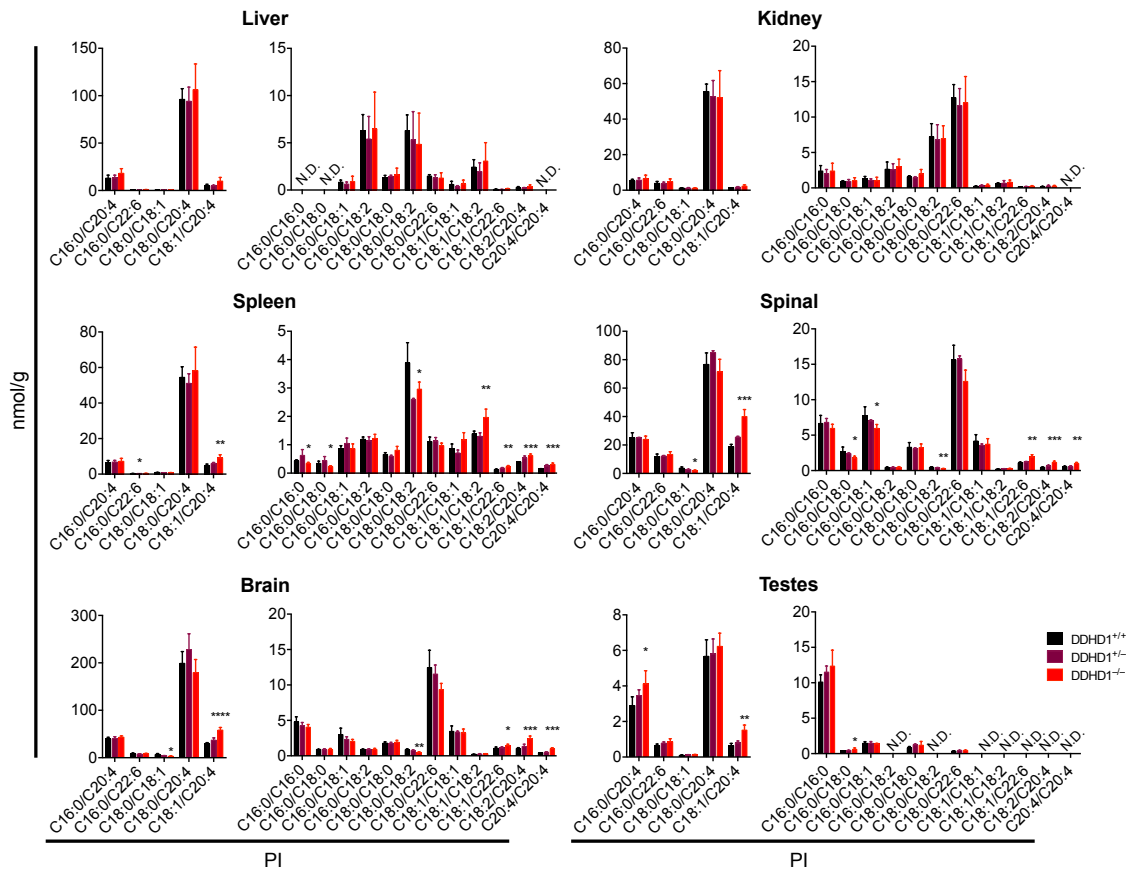

**Figure S6. Targeted LC-M-based quantification of PI lipids in tissues from DDHD1<sup>-/-</sup> and DDHD1<sup>+/-</sup> mice.** N.D. denotes lipids that could not be quantified in the indicated tissue. N = 4. Error bars represent averages ± SEM. \* P<0.05, \*\* P<0.01, \*\*\* P<0.001, \*\*\*\* P<0.0001, DDHD1<sup>+/-</sup> vs. DDHD1<sup>-/-</sup>.

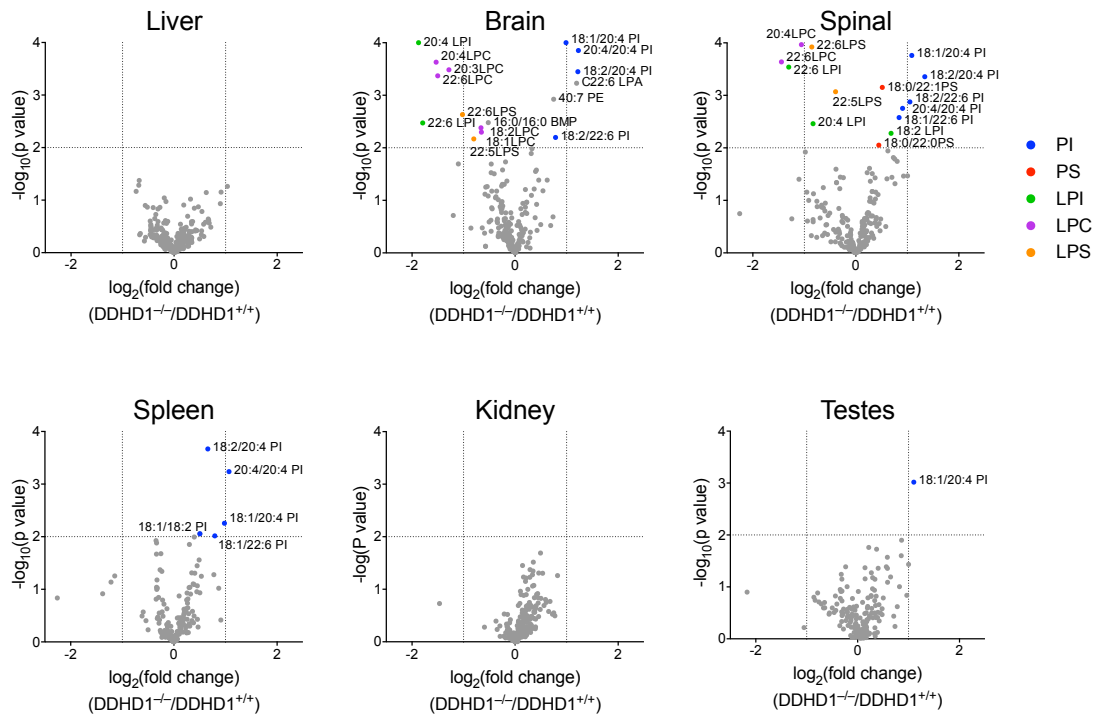

**Figure S7. Metabolomic analysis identifies phospholipid changes in tissues from DDHD1<sup>-/-</sup> mice.** Volcano plots showing relative abundance of metabolites (x-axis) versus significance of the observed changes (y-axis) in the indicated tissues from DDHD1<sup>-/-</sup> and DDHD1<sup>+/+</sup> mice. Structural assignments for significantly changing metabolites ( $P < 0.001$ ) with log<sub>2</sub> transformed fold changes of  $< -1$  or  $> 1$  are shown next to data points. For integrated peak areas of all extracted metabolites see (Table S1).

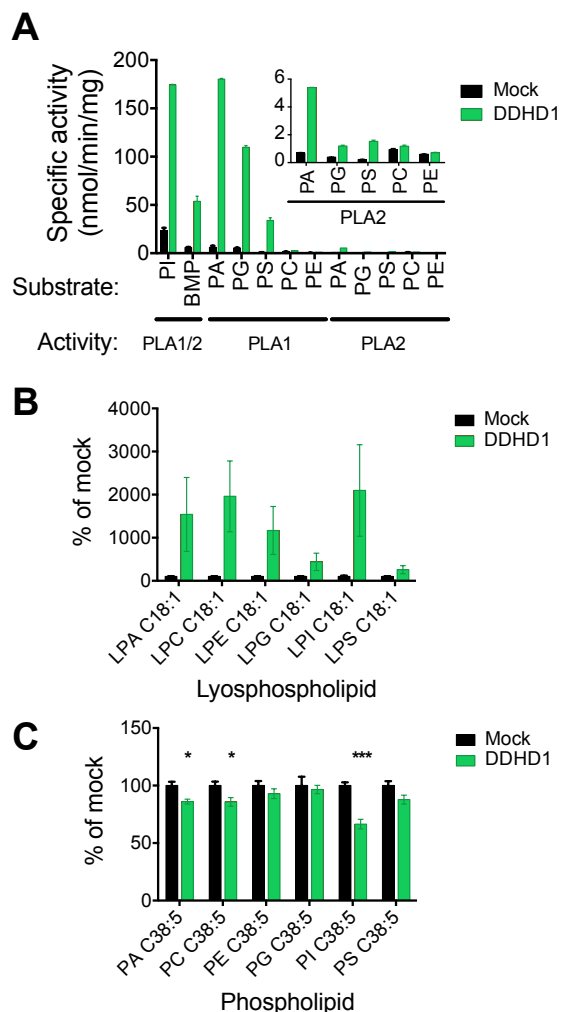

**Figure S8. Measurement of phospholipase substrate selectivity of recombinantly expressed DDHD1.** (A) Phospholipase activity of soluble lysates from mock or DDHD1-transfected HEK293T cells. Lysates were incubated with 100  $\mu$ M of various phospholipid substrates and generation of lysophospholipids was measured by quantification to an appropriate internal standard. When lipids with two unique acyl chains were used, cleavage of the acyl chain at the SN-1 or SN-2 position are denoted as PLA1 and PLA2 activity, respectively. The inset depicts PLA2 activity for various phospholipid classes. Phospholipids used as substrates: for PA, PC, PE, PS, and PG, 16:0-D31/18:1; for PI, 16:0/16:0; for BMP, 14:0/14:0. (B) Mock- or DDHD1-transfected HEK293T cells were harvested 48 h after transfection and lipids extracted and analyzed by untargeted LC-MS analysis as described in the **Methods** section. For additional lipids see **Table S2**. (C) Phospholipids analyzed as in part B. N = 4, error bars represent mean  $\pm$  SEM., \*  $P < 0.05$ , \*\*\*  $P < 0.001$ , Mock vs. DDHD1.

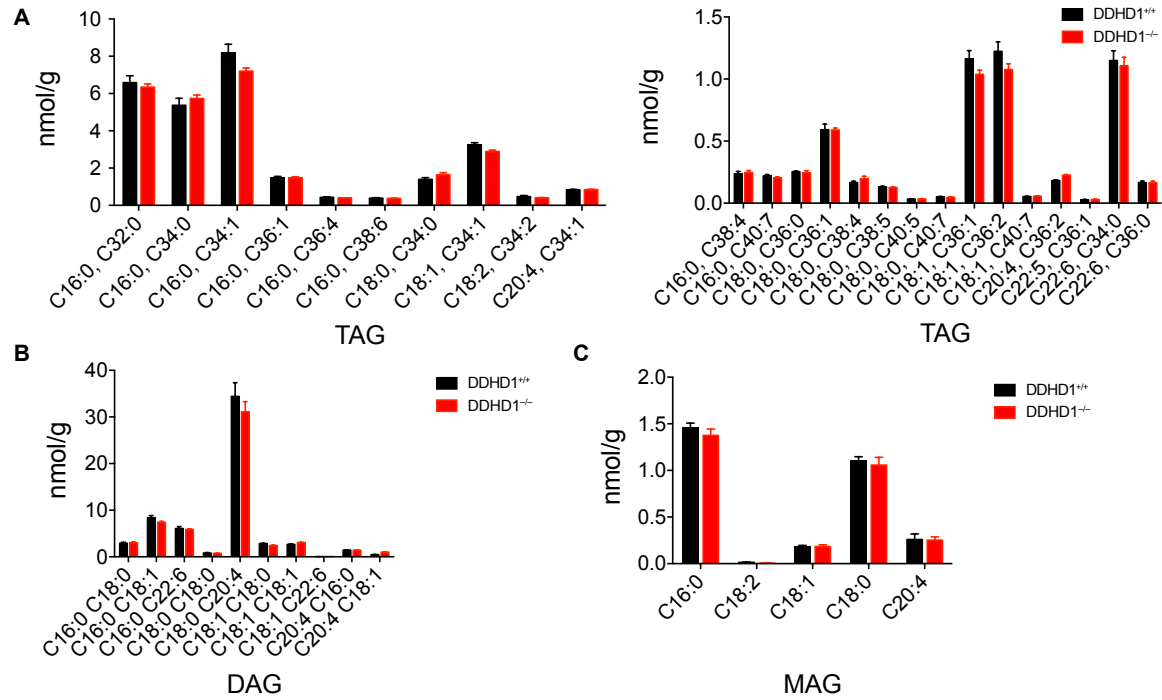

**Figure S9. DDHD1 does not regulate neutral lipids in the brain.** (A-C) Targeted LC-M-based quantification of triacylglycerol (TAG) (A), diacylglycerol (DAG) (B), and monoacylglycerol (MAG) (C) lipids in brain tissue from DDHD1<sup>+/+</sup> and DDHD1<sup>-/-</sup> mice. Data were normalized to an unnatural TAG, DAG or MAG internal standards. N=4, Error bars represent means  $\pm$  SEM.

| Lipid      | m/z   | Retention time (min) | DDHD1+/+  |                    | DDHD1-/-  |                    | Fold change (KO/WT) | P value  |
|------------|-------|----------------------|-----------|--------------------|-----------|--------------------|---------------------|----------|
|            |       |                      | Mean area | Standard deviation | Mean area | Standard deviation |                     |          |
| <b>LPI</b> |       |                      |           |                    |           |                    |                     |          |
| 18:0       | 595.3 | 28.9                 | 1758900   | 443837             | 1393793   | 169020             | 0.79                | 0.21     |
| 18:1       | 597.3 | 28.6                 | 329006    | 24041              | 407975    | 50509              | 1.24                | 0.02     |
| 20:4       | 619.3 | 23.9                 | 2222019   | 260361             | 530594    | 854529             | 0.24                | 1.55E-05 |
| 22:6       | 643.3 | 24.4                 | 210077    | 37230              | 42326     | 16178              | 0.2                 | 1.70E-04 |
| <b>PI</b>  |       |                      |           |                    |           |                    |                     |          |
| 30:0       | 781.5 | 37.7                 | 480844    | 90279              | 607474    | 281370             | 1.26                | 0.42     |
| 32:0       | 809.5 | 38.6                 | 1677567   | 155219             | 1664508   | 424958             | 0.99                | 0.96     |
| 32:1       | 807.5 | 34.2                 | 4620576   | 769133             | 4769340   | 1240167            | 1.03                | 0.85     |
| 32:2       | 805.5 | 37.6                 | 439980    | 89604              | 569652    | 207015             | 1.29                | 0.29     |
| 34:0       | 837.5 | 39.5                 | 1011548   | 101032             | 848154    | 123192             | 0.84                | 0.09     |
| 34:1       | 835.5 | 37.2                 | 91592280  | 6725953            | 88279325  | 4141556            | 0.96                | 0.43     |
| 34:2       | 833.5 | 37.9                 | 194752    | 37859              | 387261    | 208556             | 1.99                | 0.12     |
| 36:0       | 865.6 | 40.7                 | 1151863   | 56928              | 1024111   | 407333             | 0.89                | 0.56     |
| 36:1       | 863.6 | 39.4                 | 1572362   | 214807             | 1127877   | 161422             | 0.72                | 0.02     |
| 36:2       | 861.5 | 38.7                 | 501590    | 121841             | 481462    | 166555             | 0.96                | 0.85     |
| 36:4       | 857.5 | 38.1                 | 5529619   | 3418665            | 7692761   | 353156             | 1.39                | 0.25     |
| 36:5       | 855.5 | 37.5                 | 113248    | 26352              | 206549    | 24783              | 1.82                | 2.10E-03 |
| 38:4       | 885.6 | 39                   | 32688523  | 3284052            | 30262983  | 2694934            | 0.93                | 0.3      |
| 38:5       | 883.5 | 35.1                 | 3157351   | 334626             | 5343551   | 679204             | 1.69                | 1.18E-03 |
| 38:6       | 881.5 | 38.2                 | 252742    | 71598              | 388442    | 51024              | 1.54                | 0.02     |
| 40:5       | 911.6 | 37.9                 | 61789     | 13700              | 113772    | 10090              | 1.84                | 8.76E-04 |
| 40:7       | 907.5 | 37                   | 132176    | 13758              | 158044    | 21899              | 1.2                 | 0.09     |
| 40:8       | 905.5 | 36.4                 | 123473    | 11673              | 264885    | 22427              | 2.15                | 3.05E-05 |
| 42:10      | 929.5 | 37.7                 | 52206     | 4951               | 59215     | 6722               | 1.13                | 0.14     |
| 42:8       | 933.6 | 38.7                 | 5755      | 1339               | 15981     | 2383               | 2.78                | 2.94E-04 |
| <b>LPA</b> |       |                      |           |                    |           |                    |                     |          |
| 16:0       | 409.2 | 23.7                 | 166648    | 22113              | 136166    | 32533              | 0.82                | 0.19     |
| 18:0       | 437.3 | 25.4                 | 383947    | 188769             | 413234    | 157957             | 1.08                | 0.83     |
| 18:1       | 435.3 | 24.1                 | 193521    | 54536              | 180243    | 62189              | 0.93                | 0.77     |
| 20:4       | 458.2 | 23.9                 | 330530    | 49068              | 202258    | 30597              | 0.61                | 0.07     |
| 22:6       | 482.2 | 24.6                 | 355913    | 75885              | 760981    | 112872             | 2.14                | 0.02     |
| <b>PA</b>  |       |                      |           |                    |           |                    |                     |          |
| 32:0       | 647.5 | 30.2                 | 788715    | 81686              | 804994    | 81838              | 1.02                | 0.88     |
| 34:1       | 673.5 | 30.5                 | 16644352  | 1669284            | 13838513  | 1725163            | 0.83                | 0.13     |
| 36:2       | 699.5 | 30.8                 | 6753078   | 536432             | 7001198   | 721776             | 1.04                | 0.76     |
| 36:4       | 695.5 | 32.0                 | 2572640   | 425587             | 2021062   | 253697             | 0.79                | 0.14     |
| 38:4       | 723.5 | 31.4                 | 5490703   | 574444             | 5118959   | 370356             | 0.93                | 0.44     |
| 38:5       | 721.5 | 30.5                 | 1337435   | 151119             | 1534191   | 296923             | 1.15                | 0.31     |

| Lipid      | m/z   | Retention time (min) | DDHD1 +/+ |                    | DDHD1 -/- |                    | Fold change (KO/WT) | P value  |
|------------|-------|----------------------|-----------|--------------------|-----------|--------------------|---------------------|----------|
|            |       |                      | Mean area | Standard deviation | Mean area | Standard deviation |                     |          |
| <b>LPS</b> |       |                      |           |                    |           |                    |                     |          |
| 18:1       | 522.3 | 25.6                 | 343250    | 64793              | 323915    | 72729              | 0.94                | 0.71     |
| 20:4       | 544.3 | 29.9                 | 62852     | 13318              | 48683     | 17530              | 0.77                | 0.13     |
| 22:6       | 568.3 | 29.7                 | 1504264   | 388482             | 695896    | 306398             | 0.46                | 0.01     |
| <b>PS</b>  |       |                      |           |                    |           |                    |                     |          |
| 34:1       | 760.5 | 35.2                 | 9014291   | 526812             | 8988885   | 237590             | 1                   | 0.97     |
| 36:1       | 788.5 | 33.6                 | 30697627  | 4359626            | 21543115  | 1428819            | 0.7                 | 0.17     |
| 36:2       | 786.5 | 32.6                 | 29284282  | 1907439            | 31564988  | 3394892            | 1.08                | 0.39     |
| 38:4       | 810.5 | 33                   | 12300099  | 640272             | 11453722  | 814592             | 0.93                | 0.28     |
| <b>LPE</b> |       |                      |           |                    |           |                    |                     |          |
| 16:0       | 452.3 | 30.4                 | 700371    | 33017              | 726423    | 109117             | 1.04                | 0.66     |
| 16:0-O     | 438.3 | 31.3                 | 42105     | 6692               | 38994     | 7775               | 0.93                | 0.57     |
| 16:0-P     | 436.3 | 31.3                 | 296642    | 34663              | 314429    | 53683              | 1.06                | 0.6      |
| 16:1       | 450.3 | 30.6                 | 14492     | 4508               | 18802     | 8670               | 1.3                 | 0.41     |
| 18:0       | 480.3 | 32.7                 | 1026208   | 244034             | 1172925   | 469445             | 1.14                | 0.6      |
| 18:0-O     | 466.3 | 32.5                 | 102090    | 10562              | 118270    | 23700              | 1.16                | 0.26     |
| 18:0-P     | 464.3 | 33.5                 | 276401    | 25202              | 262445    | 75594              | 0.95                | 0.74     |
| 18:1       | 478.3 | 30.9                 | 1448716   | 146816             | 1141351   | 246536             | 0.79                | 0.08     |
| 18:2       | 476.3 | 29.2                 | 43542     | 11502              | 30374     | 3529               | 0.7                 | 0.07     |
| 20:1       | 506.3 | 32.9                 | 69878     | 22083              | 72124     | 29284              | 1.03                | 0.91     |
| 20:4       | 500.3 | 29.3                 | 375532    | 64085              | 261336    | 63138              | 0.7                 | 0.04     |
| 22:1       | 534.4 | 30.1                 | 64997     | 27202              | 71468     | 34871              | 1.1                 | 0.78     |
| 22:4       | 528.3 | 30.9                 | 345528    | 86539              | 351525    | 109649             | 1.02                | 0.93     |
| 22:5       | 526.3 | 30.8                 | 30491     | 7126               | 29894     | 9172               | 0.98                | 0.92     |
| 22:6       | 524.3 | 30.1                 | 1178518   | 230432             | 800906    | 54228              | 0.68                | 0.02     |
| 24:1       | 562.4 | 31.2                 | 49957     | 37027              | 65008     | 48401              | 1.3                 | 0.64     |
| <b>PE</b>  |       |                      |           |                    |           |                    |                     |          |
| 32:0       | 690.5 | 42                   | 46245     | 2216               | 60436     | 4888               | 1.31                | 1.85E-03 |
| 34:1       | 716.5 | 42.8                 | 1806423   | 43354              | 1767054   | 126717             | 0.98                | 0.58     |
| 36:0       | 746.6 | 42.6                 | 7179293   | 457877             | 8127542   | 775492             | 1.13                | 0.08     |
| 36:1       | 744.6 | 45.2                 | 1127326   | 65758              | 1012111   | 31811              | 0.9                 | 0.02     |
| 36:2       | 742.5 | 43.2                 | 3100347   | 122632             | 3569201   | 299103             | 1.15                | 0.03     |
| 36:4       | 738.5 | 41.2                 | 1540055   | 139595             | 1372891   | 187153             | 0.89                | 0.2      |
| 38:1       | 772.6 | 43                   | 3537352   | 130419             | 3526938   | 149509             | 1                   | 0.92     |
| 38:2       | 770.6 | 41.2                 | 55444     | 10081              | 62514     | 15240              | 1.13                | 0.47     |
| 38:4       | 766.5 | 44                   | 13852668  | 669151             | 13526577  | 765000             | 0.98                | 0.54     |
| 38:5       | 764.5 | 41.8                 | 2441739   | 161301             | 2909175   | 328789             | 1.19                | 0.04     |
| 38:6       | 762.5 | 41.3                 | 5270460   | 575255             | 5805312   | 920471             | 1.1                 | 0.36     |
| 38:7       | 760.5 | 43.4                 | 262293    | 10426              | 264595    | 17327              | 1.01                | 0.83     |
| 40:9       | 784.5 | 41.7                 | 1951      | 1008               | 2047      | 549                | 1.05                | 0.87     |
| 44:10      | 838.5 | 42.5                 | 251380    | 26761              | 418024    | 24321              | 1.66                | 9.21E-05 |



| Lipid      | m/z   | Retention time (min) | DDHD1+/+  |                    | DDHD1-/-  |                    | Fold change (KO/WT) | P value  |
|------------|-------|----------------------|-----------|--------------------|-----------|--------------------|---------------------|----------|
|            |       |                      | Mean area | Standard deviation | Mean area | Standard deviation |                     |          |
| <b>LPC</b> |       |                      |           |                    |           |                    |                     |          |
| 16:0       | 496.3 | 37.74                | 245783592 | 2.4E+07            | 234445915 | 1.9E+07            | 0.95                | 0.48     |
| 18:1       | 522.4 | 38.37                | 87717158  | 9915646            | 82890663  | 5848960            | 0.94                | 0.43     |
| 18:0       | 524.4 | 40.25                | 149075713 | 3.5E+07            | 127837799 | 2.6E+07            | 0.86                | 0.37     |
| 20:4       | 544.3 | 36.44                | 78835397  | 8024187            | 29248696  | 4436710            | 0.37                | 3.70E-05 |
| 22:6       | 568.3 | 36.54                | 65223078  | 9825983            | 27242193  | 2011848            | 0.42                | 2.75E-04 |
| <b>PC</b>  |       |                      |           |                    |           |                    |                     |          |
| 30:0       | 706.5 | 46.35                | 65561552  | 5024104            | 71642795  | 4161032            | 1.09                | 0.11     |
| 32:2       | 730.6 | 46                   | 24217588  | 5147551            | 23950791  | 4360615            | 0.99                | 0.94     |
| 32:1       | 732.6 | 46.58                | 105745527 | 1.1E+07            | 103669491 | 9443638            | 0.98                | 0.79     |
| 32:0       | 734.6 | 47.18                | 95713173  | 7852701            | 101804735 | 3623232            | 1.06                | 0.21     |
| 34:4       | 754.5 | 46.01                | 7285364   | 1869232            | 8350524   | 1460932            | 1.15                | 0.4      |
| 34:2       | 758.6 | 46.86                | 24925293  | 3042091            | 28812667  | 899316             | 1.16                | 0.05     |
| 34:1       | 760.6 | 47.46                | 142514220 | 5872401            | 140591720 | 8760210            | 0.99                | 0.73     |
| 34:0       | 762.6 | 48.03                | 65288484  | 2388355            | 71939312  | 3067575            | 1.1                 | 0.01     |
| 36:5       | 780.6 | 46.16                | 19571447  | 3115133            | 21875204  | 1966216            | 1.12                | 0.26     |
| 36:4       | 782.6 | 46.88                | 71389428  | 8565519            | 72252424  | 2139975            | 1.01                | 0.85     |
| 36:2       | 786.6 | 47.6                 | 27043319  | 1138140            | 31300377  | 2606126            | 1.16                | 0.02     |
| 36:1       | 788.6 | 48.31                | 164341608 | 5962806            | 149316623 | 1.3E+07            | 0.91                | 0.08     |
| 36:0       | 790.6 | 48.31                | 23387748  | 725432             | 21283780  | 1959482            | 0.91                | 0.09     |
| 38:6       | 806.6 | 46.7                 | 81008350  | 9902512            | 82596127  | 4604431            | 1.02                | 0.78     |
| 38:5       | 808.6 | 46.98                | 31669459  | 5037768            | 39555106  | 1698688            | 1.25                | 0.03     |
| 38:4       | 810.6 | 47.78                | 53021904  | 4739104            | 52354176  | 3830040            | 0.99                | 0.83     |
| 40:9       | 828.6 | 46.03                | 1094742   | 239519             | 1300543   | 415933             | 1.19                | 0.42     |
| 40:8       | 830.6 | 46.38                | 7711966   | 677320             | 9701983   | 889809             | 1.26                | 0.01     |
| 40:7       | 832.6 | 46.96                | 13660468  | 2202452            | 16502744  | 851033             | 1.21                | 0.05     |
| 40:5       | 836.6 | 47.83                | 9401237   | 980921             | 10253389  | 396455             | 1.09                | 0.16     |
| 42:10      | 854.6 | 46.31                | 13282957  | 1403749            | 11928955  | 985643             | 0.9                 | 0.17     |
| 42:9       | 856.6 | 46.3                 | 2792281   | 193979             | 2534081   | 312402             | 0.91                | 0.21     |
| 42:8       | 858.6 | 47.03                | 289258    | 43374              | 462441    | 66885              | 1.6                 | 4.85E-03 |
| 42:7       | 860.6 | 47.85                | 1111201   | 147931             | 1405596   | 121517             | 1.26                | 0.02     |

| Lipid      | m/z    | Retention time (min) | DDHD1+/+  |                    | DDHD1-/-  |                    | Fold change (KO/WT) | P value |
|------------|--------|----------------------|-----------|--------------------|-----------|--------------------|---------------------|---------|
|            |        |                      | Mean area | Standard deviation | Mean area | Standard deviation |                     |         |
| <b>MAG</b> |        |                      |           |                    |           |                    |                     |         |
| 16:0       | 331.3  | 39.96                | 8206386   | 2102937            | 6664246   | 1302537            | 0.81                | 0.26    |
| 18:0       | 359.3  | 42.23                | 19687447  | 3727909            | 17765358  | 4750939            | 0.9                 | 0.55    |
| 22:6       | 403.3  | 38.96                | 911122    | 226214             | 758152    | 246547             | 0.83                | 0.4     |
| <b>DAG</b> |        |                      |           |                    |           |                    |                     |         |
| 32:0       | 586.5  | 48.38                | 104891    | 10845              | 112316    | 18630              | 1.07                | 0.52    |
| 34:1       | 612.6  | 48.48                | 584710    | 51903              | 570747    | 99439              | 0.98                | 0.81    |
| 36:4       | 634.6  | 48                   | 369709    | 37891              | 335626    | 34770              | 0.91                | 0.23    |
| 36:3       | 636.6  | 48                   | 84571     | 10840              | 94905     | 5343               | 1.12                | 0.14    |
| 36:2       | 638.6  | 48.58                | 379437    | 26906              | 422308    | 48189              | 1.11                | 0.17    |
| 36:1       | 640.6  | 48.76                | 1134547   | 55043              | 1185680   | 94943              | 1.05                | 0.39    |
| 38:6       | 658.6  | 47.95                | 329084    | 45046              | 305911    | 17824              | 0.93                | 0.38    |
| 38:4       | 662.6  | 48.73                | 5115157   | 270615             | 4842337   | 1502030            | 0.95                | 0.73    |
| 40:8       | 682.6  | 46.19                | 2408831   | 557205             | 1714214   | 710004             | 0.71                | 0.17    |
| 40:7       | 684.6  | 48.03                | 36640     | 2315               | 36867     | 3830               | 1.01                | 0.92    |
| 40:6       | 686.6  | 48.68                | 291996    | 29120              | 252503    | 69215              | 0.86                | 0.33    |
| 42:6       | 706.6  | 46.39                | 65610402  | 5124767            | 71807834  | 4146256            | 1.09                | 0.11    |
| 44:12      | 730.5  | 46.08                | 13054367  | 3986165            | 16109875  | 2642913            | 1.23                | 0.25    |
| 44:11      | 732.6  | 46.61                | 105046959 | 1.1E+07            | 104297222 | 9274042            | 0.99                | 0.92    |
| 44:10      | 734.6  | 47.19                | 94785745  | 7894738            | 99805191  | 5434203            | 1.05                | 0.34    |
| <b>TAG</b> |        |                      |           |                    |           |                    |                     |         |
| 48:0       | 824.8  | 50.76                | 9244383   | 1690217            | 12190604  | 3218739            | 1.32                | 0.21    |
| 51:0       | 860.8  | 58.38                | 3090615   | 842951             | 2435344   | 438583             | 0.79                | 0.22    |
| 52:2       | 876.8  | 51.67                | 21770565  | 1.5E+07            | 38036098  | 6280757            | 1.75                | 0.09    |
| 52:1       | 878.8  | 55.64                | 33803981  | 2.3E+07            | 53001701  | 7921520            | 1.57                | 0.16    |
| 54:5       | 898.7  | 51.32                | 15142545  | 9567122            | 15889656  | 5243154            | 1.05                | 0.9     |
| 54:3       | 902.8  | 52.2                 | 10869020  | 7602945            | 21210369  | 2008499            | 1.95                | 0.04    |
| 54:0       | 908.9  | 57.99                | 1067136   | 1078642            | 2057441   | 342419             | 1.93                | 0.13    |
| 58:8       | 948.8  | 50.69                | 198670    | 46806              | 185997    | 47587              | 0.94                | 0.72    |
| 56:6       | 948.8  | 51.95                | 868891    | 420229             | 1123257   | 466915             | 1.29                | 0.45    |
| 58:7       | 950.8  | 51.85                | 3695984   | 2432715            | 6714258   | 1403798            | 1.82                | 0.08    |
| 60:12      | 968.8  | 56.71                | 22579323  | 3194489            | 20612573  | 3802660            | 0.91                | 0.46    |
| 66:15      | 1046.9 | 52.85                | 6277533   | 1567581            | 6400716   | 1708879            | 1.02                | 0.92    |
| <b>FFA</b> |        |                      |           |                    |           |                    |                     |         |
| 16:0       | 255.3  | 28.47                | 33381115  | 2028324            | 32039390  | 1659230            | 0.96                | 0.25    |
| 18:0       | 283.3  | 30.20                | 53189734  | 4193931            | 50317370  | 5074643            | 0.95                | 0.39    |
| 18:1       | 281.3  | 28.84                | 32650530  | 3735455            | 29538169  | 3318839            | 0.90                | 0.17    |
| 20:4       | 303.2  | 27.85                | 63305484  | 4952993            | 63467577  | 3790926            | 1.00                | 0.96    |
| 22:0       | 339.3  | 33.82                | 106345    | 21628              | 143434    | 64885              | 1.35                | 0.30    |
| 24:0       | 367.4  | 35.64                | 64790     | 18563              | 70332     | 23157              | 1.09                | 0.66    |

| Lipid      | <i>m/z</i> | Retention time (min) | DDHD1 <sup>+/+</sup> |                    | DDHD1 <sup>-/-</sup> |                    | Fold change (KO/WT) | P value |
|------------|------------|----------------------|----------------------|--------------------|----------------------|--------------------|---------------------|---------|
|            |            |                      | Mean area            | Standard deviation | Mean area            | Standard deviation |                     |         |
| <b>LPG</b> |            |                      |                      |                    |                      |                    |                     |         |
| 16:0       | 483.3      | 28.3                 | 870284               | 212625             | 835604               | 202918             | 0.96                | 0.81    |
| 18:0       | 511.3      | 29.8                 | 21980                | 20477              | 61338                | 30752              | 2.79                | 0.05    |
| 18:1       | 509.3      | 28.7                 | 330258               | 47914              | 304196               | 38714              | 0.92                | 0.44    |
| 20:4       | 533.3      | 28.3                 | 145147               | 11207              | 150527               | 9536               | 1.04                | 0.49    |
| 22:6       | 557.3      | 29.3                 | 150003               | 36388              | 144619               | 21676              | 0.96                | 0.81    |
| <b>PG</b>  |            |                      |                      |                    |                      |                    |                     |         |
| 30:0       | 693.5      | 37.2                 | 14876                | 624                | 15248                | 3436               | 1.02                | 0.84    |
| 32:0       | 721.5      | 36.6                 | 591048               | 80310              | 516466               | 41927              | 0.87                | 0.23    |
| 32:0       | 721.5      | 36.6                 | 617711               | 70926              | 538111               | 82240              | 0.87                | 0.19    |
| 32:1       | 719.5      | 37.8                 | 49156                | 1612               | 50611                | 7480               | 1.03                | 0.72    |
| 32:2       | 717.5      | 32.9                 | 70361                | 9468               | 59286                | 14464              | 0.84                | 0.25    |
| 34:0       | 749.5      | 39.3                 | 213314               | 26073              | 256315               | 110870             | 1.20                | 0.48    |
| 34:1       | 747.5      | 38.7                 | 3310455              | 336112             | 3147471              | 63487              | 0.95                | 0.48    |
| 34:1       | 747.5      | 38.7                 | 3332667              | 261274             | 3135355              | 259917             | 0.94                | 0.33    |
| 36:0       | 777.6      | 39.5                 | 80147                | 11013              | 101167               | 50190              | 1.26                | 0.44    |
| 36:1       | 775.6      | 39.5                 | 413498               | 50489              | 492510               | 110451             | 1.19                | 0.24    |
| 36:4       | 769.5      | 36.8                 | 562330               | 54265              | 569474               | 36043              | 1.01                | 0.82    |
| 36:4       | 769.5      | 36.8                 | 606440               | 35100              | 606069               | 21899              | 1.00                | 0.99    |
| 38:4       | 797.5      | 39.3                 | 1118627              | 105684             | 1135643              | 101990             | 1.02                | 0.82    |
| 38:5       | 795.5      | 39.2                 | 1027196              | 88288              | 856860               | 193461             | 0.83                | 0.16    |

**Table S1. Semiquantitative analysis of brain lipids identifies phospholipids affected by DDHD1 disruption.** Untargeted lipidomics using the XCMS algorithm for data analysis was used to identify features with significantly altered levels in DDHD1<sup>-/-</sup> versus DDHD1<sup>+/+</sup> brain tissue. Lists of *m/z* values of [M+H]<sup>+</sup> or [M-H]<sup>-</sup> ions corresponding to complex lipids were manually extracted and the area under the curve of each chromatogram was calculated. Means and standard deviations of peak areas are reported for each genotype. Significantly altered features (P-value <0.05) with fold change >1.33 or <0.75 are highlighted in red. PA, phosphatidic acid; PC, phosphatidylcholine; PE, phosphatidyl ethanolamine; PG, phosphatidylglycerol; PI, phosphatidylinositol, PS, phosphatidylserine. The prefix “L” before the phospholipid class denotes lysophospholipids, which are monoacyl-glycerophospholipids. FFA, free fatty acids; MAG, monoacylglycerol; DAG, diacylglycerol; TAG, triacylglycerol. [M-H]<sup>-</sup> ions of FFA, LPA, PA, LPG, PG, LPS, PS, LPI and PI were measured. [M+H]<sup>+</sup> ions of LPE, PE, LPC PE and MAG and [M+NH<sub>4</sub>]<sup>+</sup> ions of DAG and TAG were measured. N=4 biological replicates.

**Table S2. Quantitative analysis of lipids in tissues from DDHD1<sup>+/+</sup> and DDHD1<sup>-/-</sup> mice.**

Targeted LC-MS quantification of lipids from indicated tissues in DDHD1<sup>+/+</sup> and DDHD1<sup>-/-</sup> mice. N = 4, error bars represent mean  $\pm$  SEM. In spreadsheet, asterisks for significance mark lipids that changed > 1.5 fold in DDHD1<sup>-/-</sup> tissues and displayed P values of < 0.05

See accompanying Excel sheet.

| Lipid      | m/z   | Retention time (min) | Mock      |                    | DDHD1     |                    | Fold change (DDHD1/Mock) | P value  |
|------------|-------|----------------------|-----------|--------------------|-----------|--------------------|--------------------------|----------|
|            |       |                      | Mean area | Standard deviation | Mean area | Standard deviation |                          |          |
| <b>LPI</b> |       |                      |           |                    |           |                    |                          |          |
| 16:0       | 571.3 | 24.5                 | 21800     | 4079               | 75198     | 33477              | 3.45                     | 0.02     |
| 18:0       | 595.3 | 28.9                 | 582237    | 79486              | 550569    | 43045              | 0.95                     | 0.51     |
| 18:1       | 597.3 | 28.6                 | 38061     | 16653              | 798411    | 808573             | 20.98                    | 0.11     |
| 20:4       | 619.3 | 23.9                 | 61772     | 5314               | 1173921   | 1231420            | 19                       | 0.12     |
| 22:6       | 643.3 | 24.4                 | 4031      | 1540               | 25540     | 16603              | 6.34                     | 0.04     |
| <b>PI</b>  |       |                      |           |                    |           |                    |                          |          |
| 32:0       | 809.5 | 38.6                 | 340012    | 28323              | 452699    | 31222              | 1.33                     | 1.75E-03 |
| 32:1       | 807.5 | 34.2                 | 1634333   | 189215             | 2269272   | 337332             | 1.39                     | 0.02     |
| 32:2       | 805.5 | 37.6                 | 256964    | 29429              | 306576    | 34851              | 1.19                     | 0.07     |
| 34:0       | 837.5 | 39.5                 | 64069     | 6445               | 145660    | 5437               | 2.27                     | 1.23E-06 |
| 34:1       | 835.5 | 37.2                 | 3295414   | 247073             | 3677920   | 316656             | 1.12                     | 0.11     |
| 34:2       | 833.5 | 37.9                 | 2562391   | 277697             | 2124119   | 317734             | 0.83                     | 0.08     |
| 34:4       | 829.5 | 38.8                 | 52562     | 11790              | 93784     | 35127              | 1.78                     | 0.07     |
| 36:0       | 865.6 | 40.7                 | 54580     | 7785               | 57621     | 2818               | 1.06                     | 0.49     |
| 36:1       | 863.6 | 39.4                 | 4206386   | 335101             | 4735405   | 227784             | 1.13                     | 0.04     |
| 36:2       | 861.5 | 38.7                 | 3094829   | 182940             | 2574094   | 204314             | 0.83                     | 0.01     |
| 36:4       | 857.5 | 38.1                 | 1114944   | 136692             | 1200974   | 53915              | 1.08                     | 0.29     |
| 36:5       | 855.5 | 37.5                 | 189405    | 13292              | 235775    | 73852              | 1.24                     | 0.26     |
| 38:4       | 885.6 | 39                   | 8561602   | 827942             | 5754510   | 415795             | 0.67                     | 9.16E-04 |
| 38:5       | 883.5 | 35.1                 | 1614948   | 89634              | 1073511   | 136396             | 0.66                     | 5.66E-04 |
| 38:6       | 881.5 | 38.2                 | 245157    | 27027              | 194050    | 41112              | 0.79                     | 0.08     |
| 40:5       | 911.6 | 37.9                 | 301371    | 20275              | 255012    | 16311              | 0.85                     | 0.01     |
| 40:7       | 907.5 | 35                   | 71690     | 1615               | 54990     | 6320               | 0.77                     | 2.18E-03 |
| 40:8       | 905.5 | 36.4                 | 24378     | 7417               | 16230     | 5668               | 0.67                     | 0.13     |
| 42:10      | 929.5 | 37.7                 | 17871     | 7739               | 17397     | 1704               | 0.97                     | 0.91     |
| <b>LPS</b> |       |                      |           |                    |           |                    |                          |          |
| 16:0       | 496.3 | 24                   | 23257     | 5256               | 23484     | 3317               | 1.01                     | 0.94     |
| 18:0       | 524.3 | 25.7                 | 54631     | 24884              | 640019    | 750037             | 11.72                    | 0.17     |
| 18:1       | 522.3 | 25.6                 | 51404     | 5389               | 132883    | 96294              | 2.59                     | 0.14     |
| 20:4       | 544.3 | 24.9                 | 73819     | 14936              | 88077     | 45268              | 1.19                     | 0.57     |
| 22:6       | 568.3 | 24.7                 | 5378      | 3854               | 44065     | 53424              | 8.19                     | 0.2      |
| <b>PS</b>  |       |                      |           |                    |           |                    |                          |          |
| 34:1       | 760.5 | 35.2                 | 4050801   | 112077             | 3582551   | 170515             | 0.88                     | 3.73E-03 |
| 34:4       | 754.5 | 35.6                 | 99055     | 16188              | 98558     | 3953               | 0.99                     | 0.95     |
| 36:1       | 788.5 | 33.6                 | 3208340   | 445264             | 2653311   | 285500             | 0.83                     | 0.08     |
| 36:2       | 786.5 | 32.6                 | 3526376   | 78736              | 2593825   | 114141             | 0.74                     | 1.05E-05 |
| 36:4       | 782.5 | 34                   | 300199    | 22076              | 243647    | 46401              | 0.81                     | 0.07     |
| 36:5       | 780.5 | 36.7                 | 70819     | 11414              | 124369    | 22174              | 1.76                     | 0.01     |
| 38:4       | 810.5 | 33                   | 363663    | 12333              | 393953    | 23561              | 1.08                     | 0.06     |
| 38:5       | 808.5 | 34.4                 | 477991    | 310080             | 262624    | 48329              | 0.55                     | 0.22     |
| 38:6       | 806.5 | 34.1                 | 259927    | 22354              | 246075    | 12230              | 0.95                     | 0.32     |
| 40:6       | 834.5 | 34.6                 | 598612    | 46507              | 444986    | 19243              | 0.74                     | 8.81E-04 |
| 40:7       | 832.5 | 34.6                 | 458699    | 31982              | 396434    | 24388              | 0.86                     | 0.02     |

| Lipid      | m/z   | Retention time (min) | Mock      |                    | DDHD1     |                    | Fold change (DDHD1/Mock) | P value  |
|------------|-------|----------------------|-----------|--------------------|-----------|--------------------|--------------------------|----------|
|            |       |                      | Mean area | Standard deviation | Mean area | Standard deviation |                          |          |
| <b>LPA</b> |       |                      |           |                    |           |                    |                          |          |
| 16:0       | 409.2 | 23.7                 | 61712     | 15285              | 85994     | 51830              | 1.39                     | 0.4      |
| 18:0       | 437.3 | 25.4                 | 122098    | 47347              | 82549     | 1630               | 0.68                     | 0.15     |
| 18:1       | 435.3 | 24.1                 | 449738    | 40904              | 6927828   | 7724562            | 15.4                     | 0.14     |
| 20:4       | 458.2 | 23.9                 | 135972    | 21712              | 170391    | 36432              | 1.25                     | 0.16     |
| 22:6       | 482.2 | 24.6                 | 1457745   | 151103             | 1260483   | 159085             | 0.86                     | 0.12     |
| <b>PA</b>  |       |                      |           |                    |           |                    |                          |          |
| 34:1       | 673.5 | 37.5                 | 1328459   | 117463             | 1483431   | 119008             | 1.12                     | 0.11     |
| 34:4       | 668.4 | 36.9                 | 51017     | 4455               | 46052     | 7086               | 0.9                      | 0.28     |
| 34:6       | 664.4 | 37.1                 | 74143     | 33108              | 38175     | 14774              | 0.51                     | 0.09     |
| 36:2       | 699.5 | 39.8                 | 2237396   | 54154              | 2241697   | 73503              | 1                        | 0.93     |
| 36:4       | 695.5 | 38                   | 69372     | 6305               | 58516     | 4193               | 0.84                     | 0.03     |
| 36:5       | 694.5 | 39.4                 | 505768    | 56727              | 373529    | 17357              | 0.74                     | 4.29E-03 |
| 36:6       | 692.4 | 38.5                 | 285076    | 59320              | 204540    | 36586              | 0.72                     | 0.06     |
| 38:4       | 723.5 | 38.4                 | 49534     | 2529               | 49786     | 8609               | 1.01                     | 0.96     |
| 38:5       | 721.5 | 30.5                 | 378354    | 25488              | 325465    | 16046              | 0.86                     | 0.01     |
| 38:6       | 720.5 | 39.7                 | 1562881   | 606968             | 1822022   | 30950              | 1.17                     | 0.43     |
| 38:7       | 718.5 | 38.9                 | 179941    | 17606              | 500162    | 46430              | 2.78                     | 1.34E-05 |
| 40:6       | 748.5 | 40.9                 | 10387424  | 626840             | 9794770   | 291946             | 0.94                     | 0.14     |
| 40:7       | 746.5 | 39.3                 | 4668921   | 800142             | 4802557   | 202878             | 1.03                     | 0.76     |
| 40:8       | 744.5 | 39.1                 | 652078    | 117529             | 624835    | 32407              | 0.96                     | 0.67     |
| 42:10      | 768.5 | 38.6                 | 107956    | 39845              | 68347     | 8769               | 0.63                     | 0.1      |
| 42:9       | 742.5 | 38.8                 | 56278     | 8621               | 65701     | 11875              | 1.17                     | 0.25     |
| 44:12      | 792.5 | 38.8                 | 167370    | 30187              | 192735    | 11115              | 1.15                     | 0.17     |
| <b>LPG</b> |       |                      |           |                    |           |                    |                          |          |
| 16:0       | 483.3 | 28.3                 | 32891     | 1457               | 82252     | 48457              | 2.5                      | 0.09     |
| 18:0       | 511.3 | 29.8                 | 40107     | 4575               | 43730     | 7992               | 1.09                     | 0.46     |
| 18:1       | 509.3 | 28.7                 | 249345    | 12643              | 1097373   | 1005383            | 4.4                      | 0.14     |
| 20:4       | 533.3 | 28.3                 | 90770     | 29810              | 79956     | 23494              | 0.88                     | 0.59     |
| 22:6       | 557.3 | 29.3                 | 1106471   | 228095             | 1012716   | 195869             | 0.92                     | 0.56     |
| <b>PG</b>  |       |                      |           |                    |           |                    |                          |          |
| 28:0       | 665.5 | 38                   | 158912    | 45491              | 108188    | 30337              | 0.68                     | 0.11     |
| 30:0       | 693.5 | 37.2                 | 506970    | 57833              | 374117    | 16972              | 0.74                     | 4.53E-03 |
| 32:0       | 721.5 | 36.6                 | 95816     | 13897              | 89750     | 7742               | 0.94                     | 0.47     |
| 32:0       | 721.5 | 36.6                 | 350832    | 21529              | 328685    | 22014              | 0.94                     | 0.2      |
| 32:1       | 719.5 | 37.8                 | 2154405   | 144851             | 1826769   | 48323              | 0.85                     | 0.01     |
| 32:2       | 717.5 | 32.9                 | 185324    | 16479              | 516832    | 48466              | 2.79                     | 1.30E-05 |
| 34:0       | 749.5 | 39.3                 | 1205410   | 81780              | 1124995   | 37987              | 0.93                     | 0.12     |
| 34:1       | 747.5 | 38.7                 | 2429603   | 646268             | 2205849   | 207754             | 0.91                     | 0.53     |
| 34:1       | 747.5 | 38.7                 | 10382179  | 628154             | 9851439   | 330845             | 0.95                     | 0.19     |
| 36:0       | 777.6 | 39.5                 | 227433    | 12450              | 187520    | 7289               | 0.82                     | 1.47E-03 |
| 36:1       | 775.6 | 39.5                 | 1567400   | 158221             | 1417723   | 75252              | 0.9                      | 0.14     |
| 36:4       | 769.5 | 36.8                 | 472031    | 84988              | 469289    | 29560              | 0.99                     | 0.95     |
| 38:4       | 797.5 | 39.3                 | 948444    | 174926             | 945936    | 63852              | 1                        | 0.98     |
| 38:5       | 795.5 | 39.2                 | 281682    | 43004              | 271895    | 20448              | 0.97                     | 0.7      |

| Lipid      | m/z   | Retention time (min) | Mock      |                    | DDHD1     |                    | Fold Change (DDHD1/Mock) | P value  |
|------------|-------|----------------------|-----------|--------------------|-----------|--------------------|--------------------------|----------|
|            |       |                      | Mean area | Standard deviation | Mean area | Standard deviation |                          |          |
| <b>LPE</b> |       |                      |           |                    |           |                    |                          |          |
| 16:0       | 454.3 | 37.5                 | 259063    | 27339              | 441586    | 93939              | 1.7                      | 0.01     |
| 18:1       | 480.3 | 37.5                 | 376355    | 25903              | 4398356   | 4195680            | 11.69                    | 0.1      |
| 18:0       | 482.3 | 39.7                 | 410616    | 67522              | 738395    | 42199              | 1.8                      | 1.73E-04 |
| 20:4       | 502.3 | 36.2                 | 151439    | 35870              | 1046110   | 1587417            | 6.91                     | 0.3      |
| <b>PE</b>  |       |                      |           |                    |           |                    |                          |          |
| 34:1       | 718.5 | 47                   | 9675127   | 1699418            | 9110397   | 1296783            | 0.94                     | 0.62     |
| 36:4       | 740.5 | 46.4                 | 667944    | 67480              | 797300    | 74159              | 1.19                     | 0.04     |
| 38:5       | 766.5 | 46.4                 | 2469271   | 144047             | 2287479   | 213758             | 0.93                     | 0.21     |
| 38:4       | 768.6 | 47.3                 | 925184    | 53865              | 1166939   | 75984              | 1.26                     | 4.57E-03 |
| <b>LPC</b> |       |                      |           |                    |           |                    |                          |          |
| 16:0       | 496.3 | 37.8                 | 1308863   | 69544              | 2512675   | 298141             | 1.92                     | 2.24E-04 |
| 18:1       | 522.4 | 37.8                 | 565532    | 42837              | 26293327  | 3.1E+07            | 46.49                    | 0.15     |
| 18:0       | 524.4 | 39.7                 | 426362    | 57825              | 903171    | 222271             | 2.12                     | 0.01     |
| 20:4       | 544.3 | 36.1                 | 246316    | 38035              | 1112201   | 184660             | 4.52                     | 9.38E-05 |
| <b>PC</b>  |       |                      |           |                    |           |                    |                          |          |
| 34:0       | 762.6 | 47.5                 | 5730886   | 354588             | 5942691   | 182936             | 1.04                     | 0.33     |
| 36:1       | 789.6 | 48.6                 | 12751865  | 1002567            | 14804117  | 556842             | 1.16                     | 0.01     |
| <b>CER</b> |       |                      |           |                    |           |                    |                          |          |
| d18:1/16:0 | 538.5 | 48.5                 | 7732191   | 327693             | 8192122   | 394345             | 1.06                     | 0.12     |
| d18:1/18:1 | 564.5 | 48.6                 | 18850983  | 603083             | 18629539  | 1108122            | 0.99                     | 0.74     |
| <b>SM</b>  |       |                      |           |                    |           |                    |                          |          |
| d18:1/16:0 | 703.6 | 47.2                 | 46767238  | 2529053            | 47841649  | 1531784            | 1.02                     | 0.49     |
| d18:1/18:1 | 729.6 | 47.5                 | 1043957   | 44260              | 1290832   | 128546             | 1.24                     | 0.01     |

| Lipid      | m/z   | Retention time (min) | Mock      |                    | DDHD1     |                    | Fold Change (DDHD1/Mock) | P value  |
|------------|-------|----------------------|-----------|--------------------|-----------|--------------------|--------------------------|----------|
|            |       |                      | Mean area | Standard deviation | Mean area | Standard deviation |                          |          |
| <b>MAG</b> |       |                      |           |                    |           |                    |                          |          |
| 16:0       | 331.3 | 39.4                 | 1178598   | 319095             | 1453539   | 446051             | 1.23                     | 0.35     |
| 18:0       | 359.3 | 41.5                 | 2206507   | 324969             | 3464846   | 1523020            | 1.57                     | 0.16     |
| 20:4       | 379.3 | 38.4                 | 130622    | 12512              | 277982    | 152561             | 2.13                     | 0.1      |
| 22:6       | 403.3 | 39.7                 | 53326     | 11543              | 56019     | 8336               | 1.05                     | 0.72     |
| <b>DAG</b> |       |                      |           |                    |           |                    |                          |          |
| 32:0       | 586.5 | 47.8                 | 202757    | 14126              | 253717    | 33876              | 1.25                     | 0.03     |
| 34:1       | 612.6 | 48                   | 972337    | 37328              | 1313923   | 198665             | 1.35                     | 0.01     |
| 36:3       | 636.6 | 47.6                 | 47503     | 5139               | 63311     | 12176              | 1.33                     | 0.05     |
| 36:2       | 638.6 | 48.1                 | 627086    | 44069              | 793328    | 143893             | 1.27                     | 0.07     |
| 36:1       | 640.6 | 48.7                 | 559517    | 51894              | 809958    | 170664             | 1.45                     | 0.03     |
| 38:5       | 660.6 | 47.8                 | 22443     | 6628               | 23795     | 5921               | 1.06                     | 0.77     |
| 38:4       | 662.6 | 48                   | 159008    | 55615              | 182823    | 112027             | 1.15                     | 0.72     |
| 40:8       | 682.5 | 45.6                 | 3915253   | 368758             | 3785313   | 153062             | 0.97                     | 0.54     |
| 40:6       | 686.6 | 46                   | 80749     | 1593               | 72929     | 11326              | 0.9                      | 0.22     |
| 42:6       | 706.5 | 45.9                 | 23046967  | 1440625            | 21328730  | 1076341            | 0.93                     | 0.1      |
| 44:12      | 730.5 | 46                   | 21684885  | 1282340            | 22847403  | 2847756            | 1.05                     | 0.48     |
| 44:11      | 732.6 | 46.2                 | 56433171  | 1944678            | 63829719  | 2674173            | 1.13                     | 4.22E-03 |
| 44:10      | 734.6 | 46.8                 | 6384190   | 374511             | 7314230   | 504241             | 1.15                     | 0.03     |
| <b>TAG</b> |       |                      |           |                    |           |                    |                          |          |
| 48:0       | 824.8 | 57.8                 | 11971957  | 197720             | 10150418  | 683391             | 0.85                     | 2.18E-03 |
| 50:1       | 850.8 | 58.3                 | 32324356  | 7402668            | 33128954  | 4854971            | 1.02                     | 0.86     |
| 52:0       | 880.8 | 58                   | 4624233   | 205929             | 4961147   | 131616             | 1.07                     | 0.03     |
| 52:2       | 876.8 | 58.5                 | 18935819  | 6328844            | 22900847  | 4765489            | 1.21                     | 0.36     |
| 52:1       | 878.8 | 58.3                 | 3621900   | 1331250            | 4338805   | 1062840            | 1.2                      | 0.43     |
| 54:5       | 898.8 | 57.7                 | 2282397   | 145550             | 2066919   | 69758              | 0.91                     | 0.04     |
| 54:3       | 902.8 | 58.1                 | 1008810   | 81475              | 927183    | 212976             | 0.92                     | 0.5      |
| 54:0       | 908.9 | 58.4                 | 1477876   | 86693              | 1296933   | 286796             | 0.88                     | 0.27     |

**Table S3. Semiquantitative analysis of HEK293T lipids identifies phospholipids affected by DDHD1 disruption.** Metabolic profiling was used to identify features with significantly altered levels in Mock transfected or DDHD1 transfected HEK293T cells. Lists of m/z values of [M+H]<sup>+</sup> or [M-H]<sup>-</sup> ions corresponding to complex lipids were manually extracted, and the area under the curve of each chromatogram was calculated. Means and standard deviations of peak areas are reported for each genotype. Significantly altered features (P-value <0.05) with fold change >1.33 or <0.75 are highlighted in red. [M-H]<sup>-</sup> ions of LPA, PA, LPG, PG, LPS, PS, LPI and PI were measured. [M+H]<sup>+</sup> ions of LPE, PE, LPC PE, and MAG and [M+NH4]<sup>+</sup> ions of DAG and TAG were measured. N=4 biological replicates.



## References

- (1) Carter, R. J.; Morton, J.; Dunnett, S. B. Motor Coordination and Balance in Rodents. In *Current protocols in neuroscience*; John Wiley & Sons, Inc.: Hoboken, NJ, USA, 2001; Vol. 12, pp 1–14.
- (2) Crawley, J. N.; Paylor, R. A Proposed Test Battery and Constellations of Specific Behavioral Paradigms to Investigate the Behavioral Phenotypes of Transgenic and Knockout Mice. *Horm. Behav.* **1997**, *31* (3), 197–211.
- (3) Barlow, C.; Hirotsune, S.; Paylor, R.; Liyanage, M.; Eckhaus, M.; Collins, F.; Shiloh, Y.; Crawley, J. N.; Ried, T.; Tagle, D.; Wynshaw-Boris, A. Atm-Deficient Mice: a Paradigm of Ataxia Telangiectasia. *Cell* **1996**, *86* (1), 159–171.
- (4) Crawley, J. N. *What's Wrong with My Mouse?*; John Wiley & Sons: Hoboken, NJ, USA, 2007.
- (5) Freitag, S.; Schachner, M.; Morellini, F. Behavioral Alterations in Mice Deficient for the Extracellular Matrix Glycoprotein Tenascin-R. *Behav. Brain Res.* **2003**, *145* (1-2), 189–207.
- (6) Hughes, R. N. The Value of Spontaneous Alternation Behavior (SAB) as a Test of Retention in Pharmacological Investigations of Memory. *Neurosci Biobehav Rev* **2004**, *28* (5), 497–505.
- (7) Lalonde, R. The Neurobiological Basis of Spontaneous Alternation. *Neurosci Biobehav Rev* **2002**, *26* (1), 91–104.
- (8) Holcomb, L. A.; Gordon, M. N.; Jantzen, P.; Hsiao, K.; Duff, K.; Morgan, D. Behavioral Changes in Transgenic Mice Expressing Both Amyloid Precursor Protein and Presenilin-1 Mutations: Lack of Association with Amyloid Deposits. *Behav. Genet.* **1999**, *29* (3), 177–185.
- (9) Pennanen, L.; Wolfer, D. P.; Nitsch, R. M.; Götz, J. Impaired Spatial Reference Memory and Increased Exploratory Behavior in P301L Tau Transgenic Mice. *Genes Brain Behav.* **2006**, *5* (5), 369–379.
- (10) Bannon, A. W.; Malmberg, A. B. Models of Nociception: Hot-Plate, Tail-Flick, and Formalin Tests in Rodents. *Curr Protoc Neurosci* **2007**, *Chapter 8* (1), Unit8.9–8.9.16.
- (11) Hsu, F.-F.; Turk, J. Characterization of Phosphatidylinositol, Phosphatidylinositol-4-Phosphate, and Phosphatidylinositol-4,5-Bisphosphate by Electrospray Ionization Tandem Mass Spectrometry: a Mechanistic Study. *J. Am. Soc. Mass Spectrom.* **2000**, *11* (11), 986–999.
